# Supplementary material for: Effect of tantalum doping in a TiO2 compact layer on the performance of planar spiro-OMeTAD free perovskite solar cells
Source: Royal Society of Chemistry journal article supplement (doi:10.1039/c7ta09193a), 2017-12-07
Supplement: c7ta09193a1.pdf [file c7ta09193a1.pdf]

## Supplementary information

### Effect of tantalum doping in TiO<sub>2</sub> compact layer on the performance of planar Spiro-OMeTAD free perovskite solar cells

Rahul Ranjan,<sup>†</sup> Asit Prakash,<sup>‡</sup> Arjun Singh,<sup>‡</sup> Anand Singh,<sup>\*,§</sup> Ashish Garg,<sup>\*,‡</sup> and Raju Kumar Gupta<sup>\*,†,||</sup>

<sup>†</sup>Department of Chemical Engineering

<sup>‡</sup>Department of Materials Science and Engineering

<sup>§</sup>Department of Chemistry

<sup>||</sup>Center for Nanosciences and Center for Environmental Science and Engineering

Indian Institute of Technology Kanpur, Kanpur 208016, Uttar Pradesh, India

\*Corresponding author. Tel: +91-5122596972; Fax: +91-5122590104.

*E-mail address:* Anand Singh (anands@iitk.ac.in); Ashish Garg ([ashishg@iitk.ac.in](mailto:ashishg@iitk.ac.in)); Raju Kumar Gupta (guptark@iitk.ac.in)

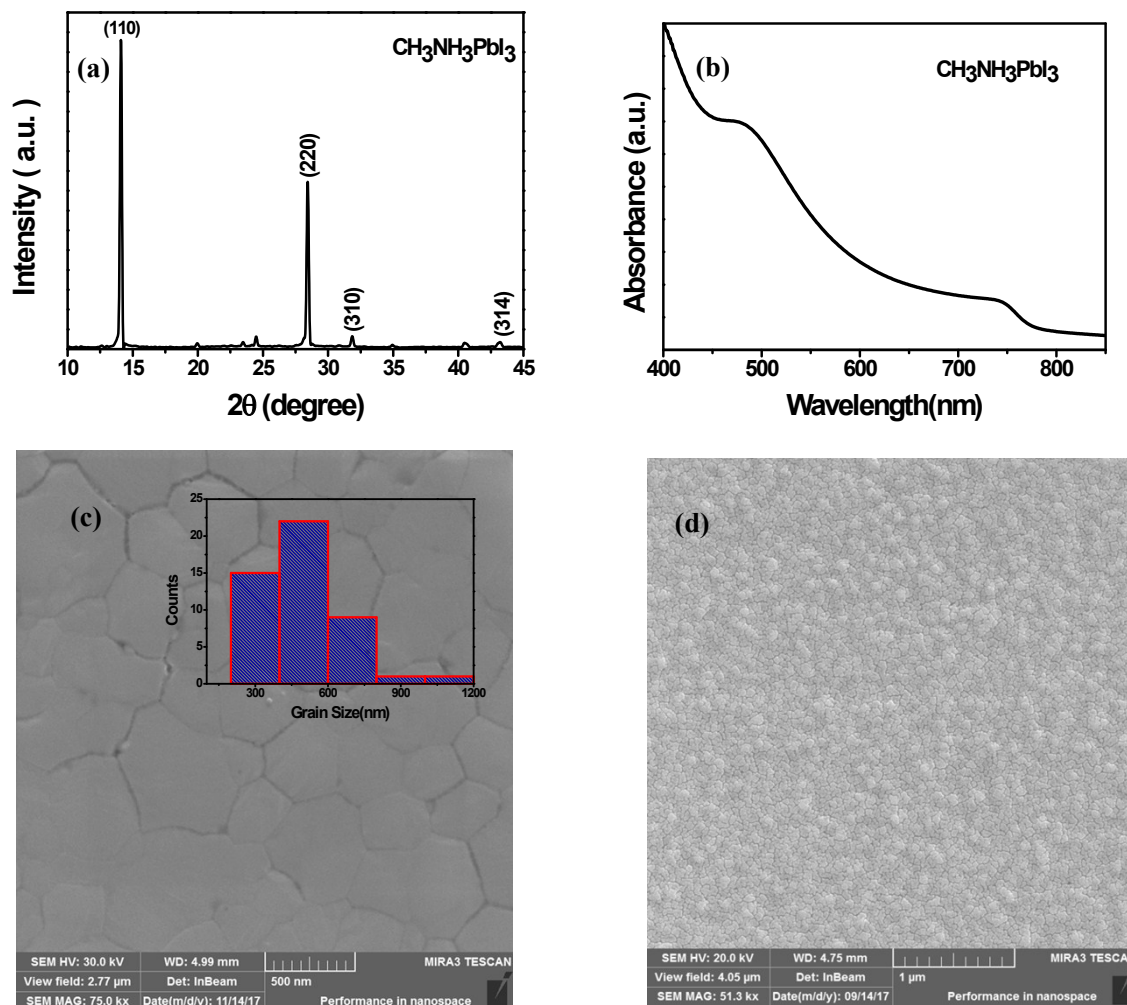

**Fig. S1** (a) XRD, (b) absorbance, and (c) SEM image of  $\text{CH}_3\text{NH}_3\text{PbI}_3$  perovskite film (inset shows grain size distribution); (d) SEM image of compact  $\text{TiO}_2$ .

The XRD data shows the characteristic perovskite peak at  $14.1^\circ$ ,  $28.4^\circ$ ,  $31.9^\circ$  and  $43.2^\circ$  corresponding to diffraction planes of (110), (220), (310) and (314) which are in agreement with previous report.<sup>1</sup> The absorbance spectrum of  $\text{CH}_3\text{NH}_3\text{PbI}_3$  film shows broad range of absorbance from 400 to 760 nm suggesting that perovskite film has good absorption in visible region. Further, SEM image shows the grain size of perovskite in the range of 200-1200 nm along with good surface coverage.

**Table-S1** Atomic % of different elements for undoped TiO<sub>2</sub> and Ta-TiO<sub>2</sub> thin film samples from XPS data

| <b>Sample</b>                 | <b>O1s (atomic %)</b> | <b>Ti2p (atomic %)</b> | <b>Ta4f (atomic %)</b> |
|-------------------------------|-----------------------|------------------------|------------------------|
| Pure TiO <sub>2</sub>         | 67.1                  | 32.9                   | 0.0                    |
| 3.0 mol.% Ta-TiO <sub>2</sub> | 66.6                  | 24.7                   | 4.2                    |
| 5.0 mol.% Ta-TiO <sub>2</sub> | 68.2                  | 23.8                   | 7.2                    |

**Table-S2** Summary of planar perovskite solar cells having P3HT as HTL

| Planar device Structure with P3HT as HTM                                                                | $J_{sc}$<br>(mA/cm <sup>2</sup> ) | FF            | $V_{oc}$     | PCE (%)                               | Year | Reference |
|---------------------------------------------------------------------------------------------------------|-----------------------------------|---------------|--------------|---------------------------------------|------|-----------|
| FTO/c-TiO <sub>2</sub> /CH <sub>3</sub> NH <sub>3</sub> PbI <sub>3-x</sub> Cl <sub>x</sub><br>/P3HT/Ag  | 17.7                              | 56.2          | 0.92         | 9.2                                   | 2014 | <b>2</b>  |
| <i>P3HT doped with Li salt and D-TBP</i>                                                                | 19.1                              | 66.3          | 0.98         | 12.4                                  |      |           |
| FTO/TiO <sub>2</sub> /MAPbI <sub>3</sub> /P3HT/Ag                                                       | 16.22                             | 45            | 1.007        | 7.42                                  | 2015 | <b>3</b>  |
| FTO/c-TiO <sub>2</sub> /CH <sub>3</sub> NH <sub>3</sub> PbI <sub>3-x</sub> Cl <sub>x</sub><br>/P3HT/Ag  | 19.06                             | 56.11         | 0.70         | 7.81                                  | 2015 | <b>4</b>  |
| <i>Au doped P3HT</i>                                                                                    | 21.53                             | 0.72          | 60.72        | 9.82                                  |      |           |
| FTO/c-TiO <sub>2</sub> /CH <sub>3</sub> NH <sub>3</sub> PbI <sub>3-x</sub> Cl <sub>x</sub><br>/P3HT/Ag  | 18.2                              | 44.6          | 0.626        | 5.1                                   | 2015 | <b>5</b>  |
| <i>P3HT doped with Li salt and D-TBP</i>                                                                | 21.8                              | 52            | 0.863        | 9.7                                   |      |           |
| FTO/c-TiO <sub>2</sub> / CH <sub>3</sub> NH <sub>3</sub> PbI <sub>3-x</sub> Cl <sub>x</sub><br>/P3HT/Ag | 14.7                              | 55.2          | 0.56         | 4.57                                  | 2016 | <b>6</b>  |
|                                                                                                         | 14.4                              | 57.1          | 0.60         | 5.26 (cesium doped TiO <sub>2</sub> ) |      |           |
| FTO/c-TiO <sub>2</sub> / CH <sub>3</sub> NH <sub>3</sub> PbI <sub>3-x</sub> Cl <sub>x</sub><br>/P3HT/Ag | 14.88<br>15.04                    | 0.458<br>0.47 | 0.85<br>0.86 | 5.85- Forward<br>6.23- Backward       | 2017 | <b>7</b>  |
| <i>Cobalt doped P3HT</i>                                                                                | 21.7<br>21.8                      | 0.68<br>0.7   | 1.05<br>1.06 | 15.87- Forward<br>16.28- Backward     |      |           |
| ITO/TiO <sub>2</sub> /MAPbI <sub>3</sub> /P3HT/Ag                                                       | 16.97                             | 61.32         | 0.87         | 9.05                                  | 2017 | <b>8</b>  |

## References:

1. Y. F. Zhao, C. Li, J. Y. Hu, Y. Y. Gong, L. Y. Niu and X. J. Liu, *Phys. Lett. A*, 2016, **380**, 910-916.
2. Y. Guo, C. Liu, K. Inoue, K. Harano, H. Tanaka and E. Nakamura, *J. Mater. Chem. A*, 2014, **2**, 13827-13830.
3. G. Qianqian, Y. Songwang, L. Lei, Z. Shude, C. Qipeng, X. Junjie, L. Jiaqing and L. Yan, *Chemistry Letters*, 2015, **44**, 624-626.
4. J.-Y. Wang, F.-C. Hsu, J.-Y. Huang, L. Wang and Y.-F. Chen, *ACS Appl. Mater. Interfaces*, 2015, **7**, 27676-27684.
5. H. Bi and Y. Zhang, *Materials Letters*, 2015, **161**, 767-769.
6. W. Wang, H. Zheng, Y. Liu, J. Sun and L. Gao, *J. Nanosci. Nanotechnol.*, 2016, **16**, 12768-12772.
7. J. W. Jung, J.-S. Park, I. K. Han, Y. Lee, C. Park, W. Kwon and M. Park, *J. Mater. Chem. A*, 2017, **5**, 12158-12167.
8. Z. Zhou, Y. Zhao, C. Zhang, D. Zou, Y. Chen, Z. Lin, H. Zhen and Q. Ling, *J. Mater. Chem. A*, 2017, **5**, 6613-6621.
